# Supplementary material for: Ligand-interchange reactions between M(iv) (M = Ti, V) oxide bis-acetylacetonates and halides of high-valent group 4 and 5 metals. A synthetic and electrochemical study
Source: Royal Society of Chemistry journal article supplement (doi:10.1039/c3dt51378e), 2013-01-01

**Ligand-Interchange Reactions Between M(IV) (M = Ti, V) Oxide Bis-Acetylacetonates and Halides of High Valent Groups 4 and 5 Metals.  
A Synthetic and Electrochemical Study**

Tiziana Funaioli, Fabio Marchetti, Guido Pampaloni, Stefano Zacchini

**SUPPORTING INFORMATION**

**Figure S1. IR spectrum (solid state, UATR) of  $\text{TiO}(\text{acac})_2$ .**

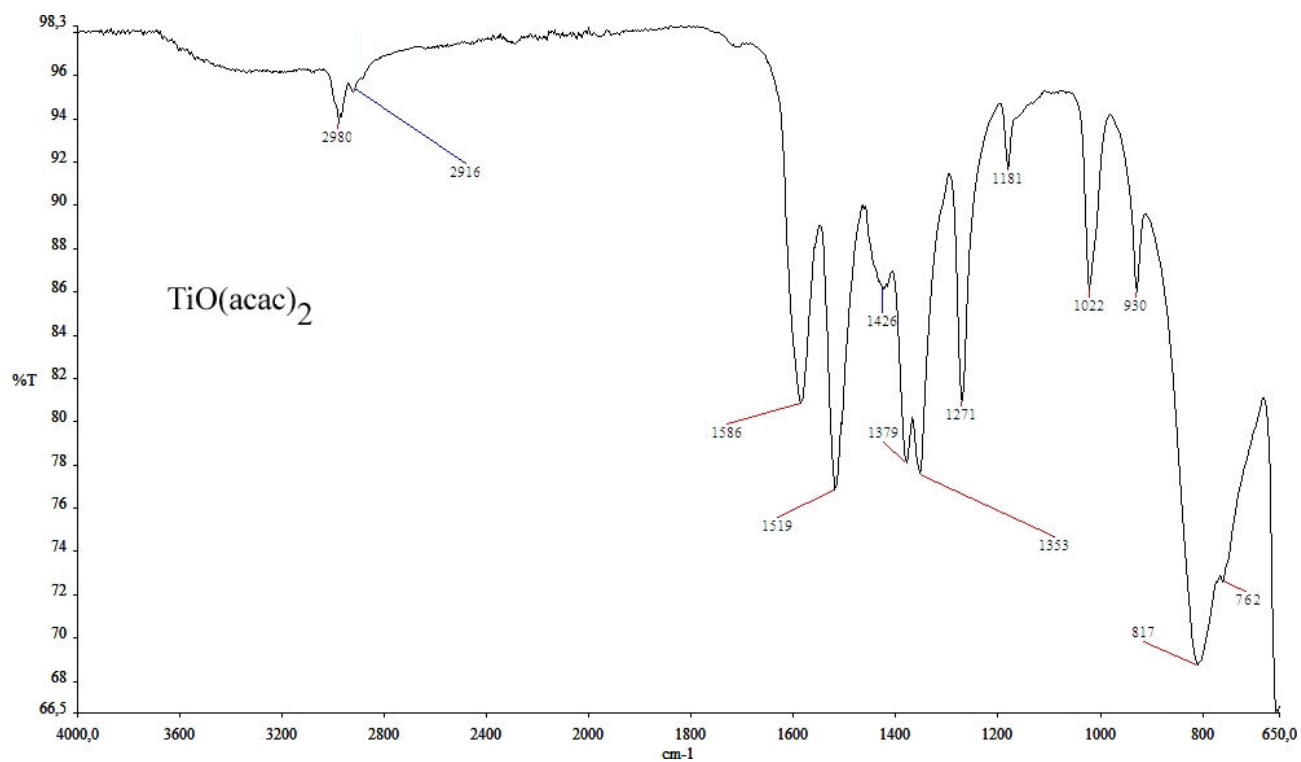

**Figure S2. IR spectrum (solid state, UATR) of VO(acac)<sub>2</sub>.**

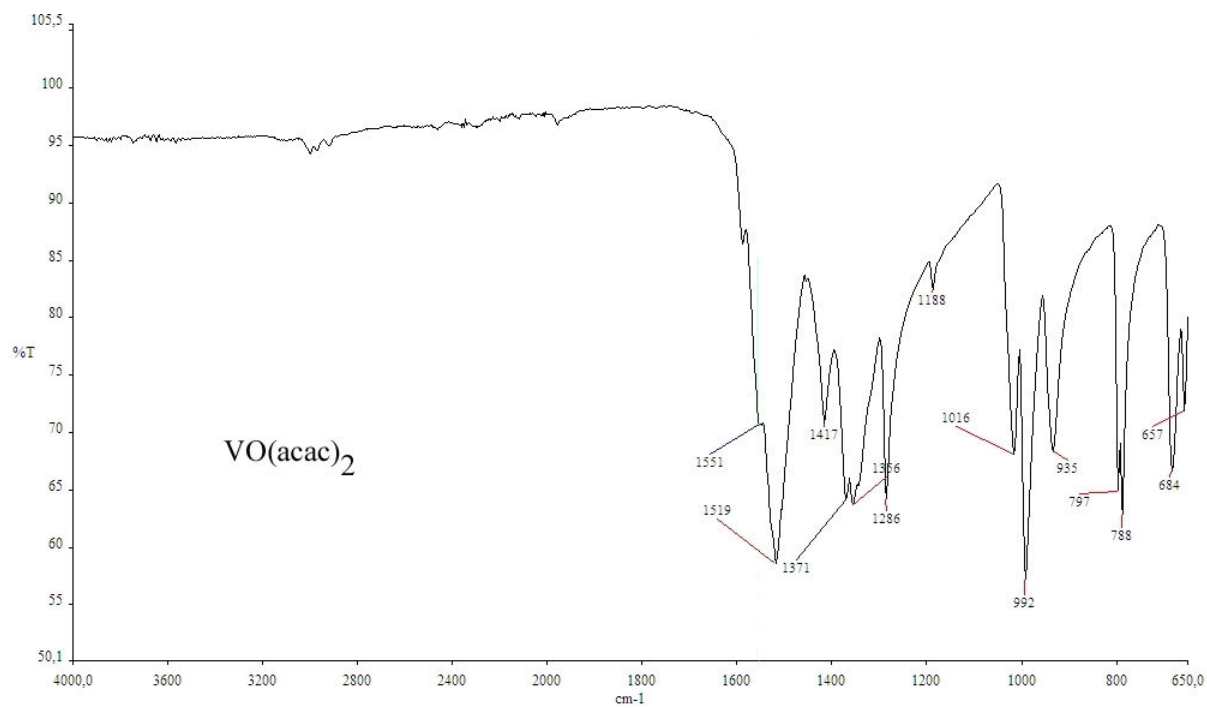

**Figure S3. IR spectrum (solid state, UATR) of  
[TaF<sub>4</sub>{OTi(acac)<sub>2</sub>}<sub>2</sub>][TaF<sub>6</sub>], 3.**

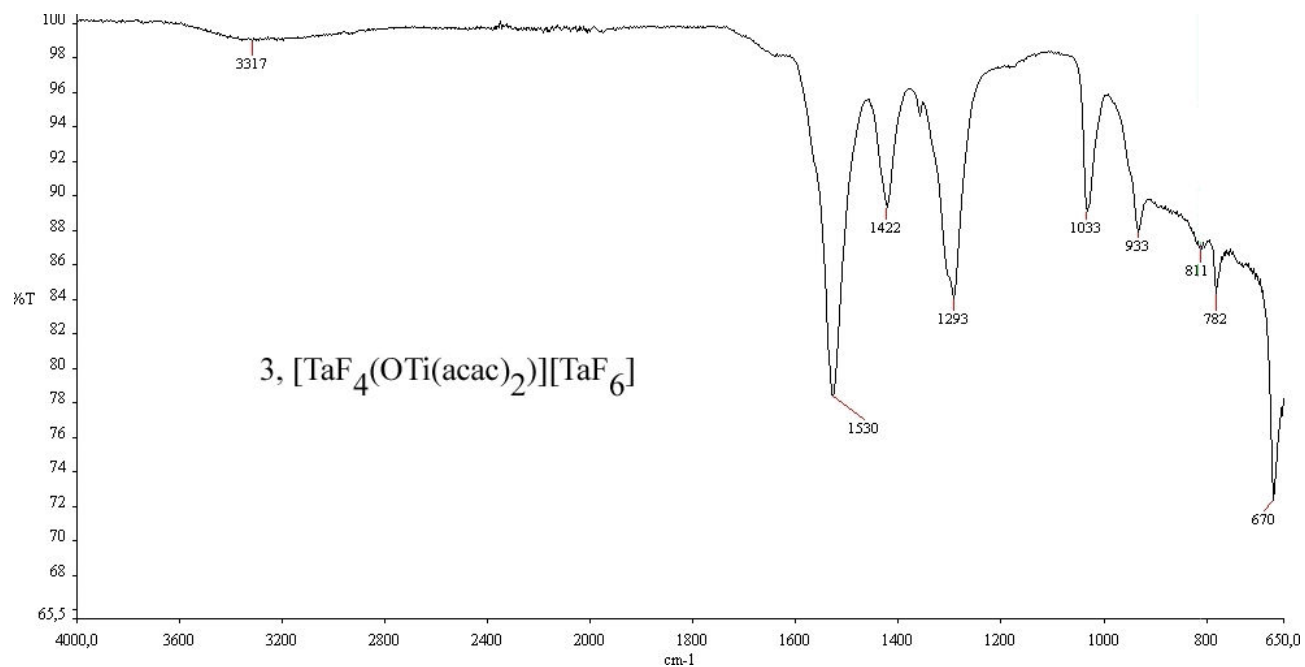

**Figure S4. IR spectrum (solid state, UATR) of  $[\text{V}(\text{acac})_3][\text{NbF}_6]$ , 4a.**

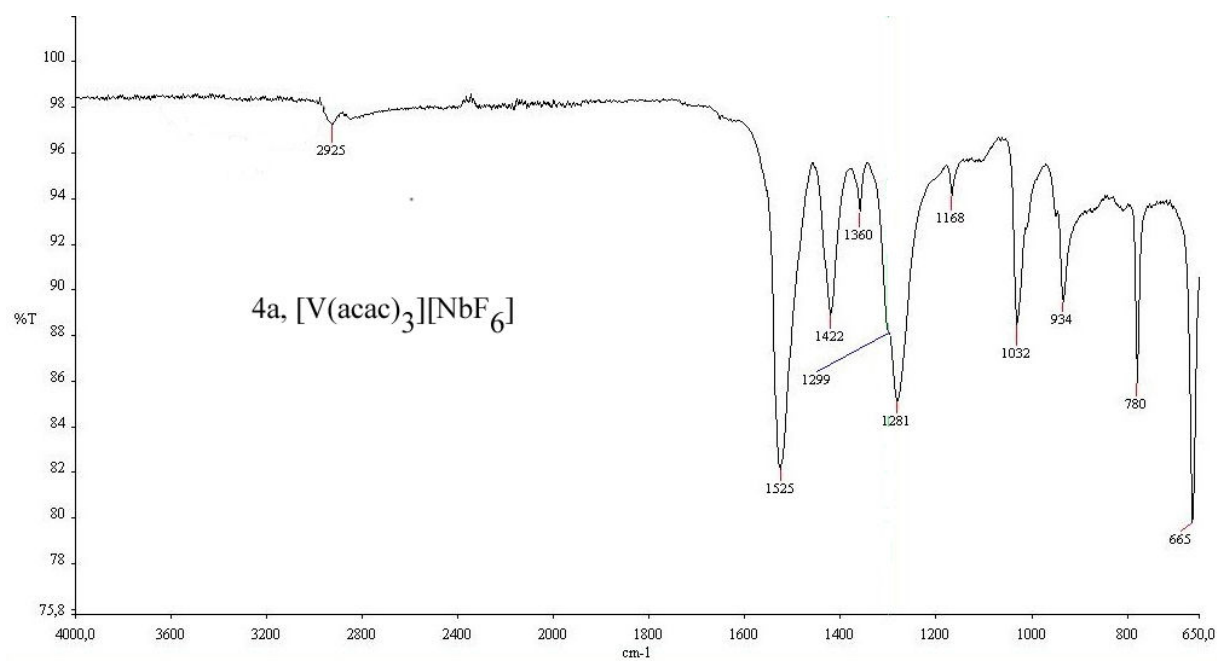

**Figure S5. IR spectrum (solid state, UATR) of  $[\text{V}(\text{acac})_3][\text{TaF}_6]$ , 4b.**

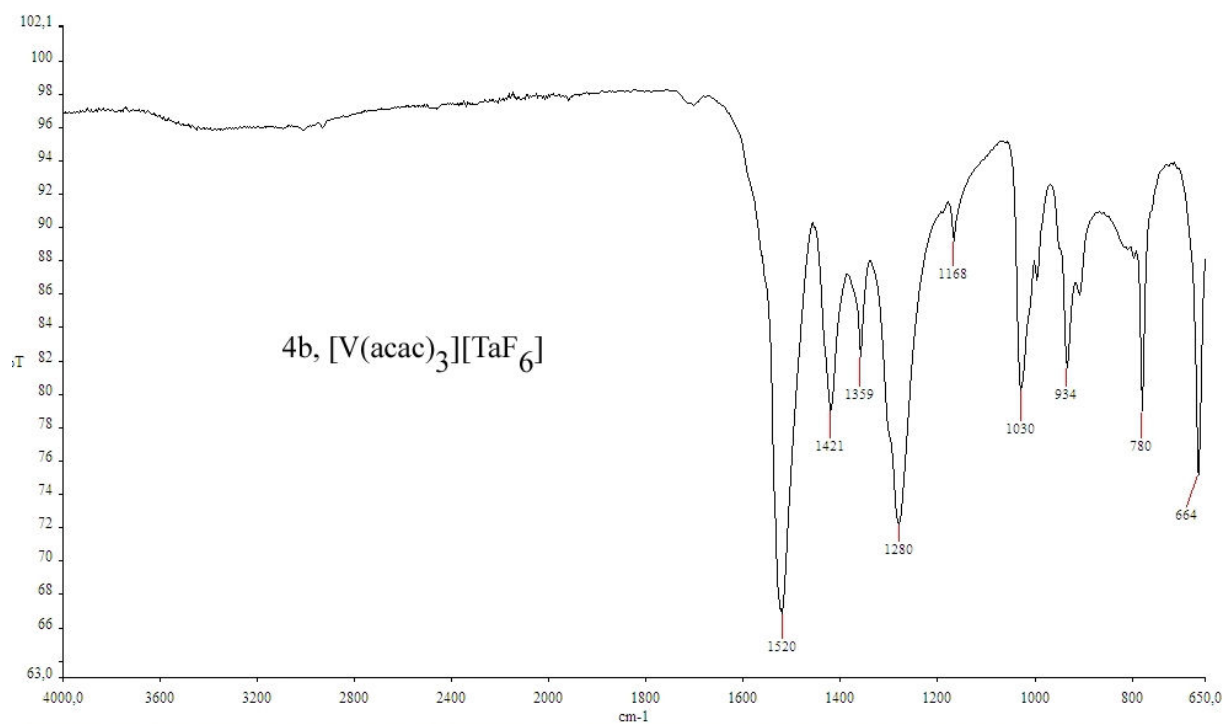

Supplement: c3dt51378e.pdf [file c3dt51378e.pdf]
